# Supplementary material
Source: publisher figshare collection journal article supplement (https://sage.figshare.com/ndownloader/files/14375444)
Supplement: Supplementary file 1 [file 14375444]

## QUESTIONNAIRE

|                                                                                                   |                                                                                                                                                                                                                                                                                                                                                                                                                                                       |          |
|---------------------------------------------------------------------------------------------------|-------------------------------------------------------------------------------------------------------------------------------------------------------------------------------------------------------------------------------------------------------------------------------------------------------------------------------------------------------------------------------------------------------------------------------------------------------|----------|
| 1. What is your age?                                                                              | [       ] years                                                                                                                                                                                                                                                                                                                                                                                                                                       |          |
| <b>Please circle your answers to all of the questions below</b>                                   |                                                                                                                                                                                                                                                                                                                                                                                                                                                       |          |
| 2. What is your sex?                                                                              | [Male]                                                                                                                                                                                                                                                                                                                                                                                                                                                | [Female] |
| 3. From where do you normally get your health information?<br>(you may choose more than 1 answer) | <div>[Doctor]</div> <div>[General knowledge]</div> <div>[Taught knowledge]</div> <div>[Internet]</div> <div>[Reading]</div> <div>[TV]</div> <div>[Word of mouth]</div>                                                                                                                                                                                                                                                                                |          |
| 4. Have you had an X-Ray before?                                                                  | [Yes]                                                                                                                                                                                                                                                                                                                                                                                                                                                 | [No]     |
| 5. Please rate your pain, by choosing a single number on the scale:                               | <div style="display: flex; justify-content: space-between; align-items: center;"> <span>0</span> <span>1</span> <span>2</span> <span>3</span> <span>4</span> <span>5</span> <span>6</span> <span>7</span> <span>8</span> <span>9</span> <span>10</span> </div> <div style="display: flex; justify-content: space-between; align-items: center; margin-top: 5px;"> <span>no pain</span> <span>moderate pain</span> <span>worst ever pain</span> </div> |          |

### KNOWLEDGE

|                                                                                                                                 |                                                                                                                                                             |                                        |                             |                               |                                    |
|---------------------------------------------------------------------------------------------------------------------------------|-------------------------------------------------------------------------------------------------------------------------------------------------------------|----------------------------------------|-----------------------------|-------------------------------|------------------------------------|
| 6. Do any of the following produce radiation that may lead to cancer at a later age?<br>(you may choose more than 1 answer)     | <div>[Air]</div> <div>[Sun]</div> <div>[X-ray scan]</div> <div>[Mobile phone]</div> <div>[CT scan]</div> <div>[MRI scan]</div> <div>[Ultrasound scan]</div> |                                        |                             |                               |                                    |
| 7. What is the nearest risk of the following occurring in a lifetime?<br>(please choose 1 answer for each of the 6 cases below) |                                                                                                                                                             |                                        |                             |                               |                                    |
| a) cancer from <b>X-ray</b> of arm                                                                                              | b) cancer from <b>CT</b> scan of spine                                                                                                                      | c) cancer from <b>MRI</b> scan of body | d) <b>cancer in general</b> | e) cancer from <b>Smoking</b> | f) dying in a <b>Road accident</b> |
| [1 in 3]                                                                                                                        | [1 in 3]                                                                                                                                                    | [1 in 3]                               | [1 in 3]                    | [1 in 3]                      | [1 in 3]                           |
| [1 in 10]                                                                                                                       | [1 in 10]                                                                                                                                                   | [1 in 10]                              | [1 in 10]                   | [1 in 10]                     | [1 in 10]                          |
| [1 in 100]                                                                                                                      | [1 in 100]                                                                                                                                                  | [1 in 100]                             | [1 in 100]                  | [1 in 100]                    | [1 in 100]                         |
| [1 in 1000]                                                                                                                     | [1 in 1000]                                                                                                                                                 | [1 in 1000]                            | [1 in 1000]                 | [1 in 1000]                   | [1 in 1000]                        |
| [1 in 100,000]                                                                                                                  | [1 in 100,000]                                                                                                                                              | [1 in 100,000]                         | [1 in 100,000]              | [1 in 100,000]                | [1 in 100,000]                     |
| [1 in 1,000,000]                                                                                                                | [1 in 1,000,000]                                                                                                                                            | [1 in 1,000,000]                       | [1 in 1,000,000]            | [1 in 1,000,000]              | [1 in 1,000,000]                   |
| [no chance]                                                                                                                     | [no chance]                                                                                                                                                 | [no chance]                            | [no chance]                 | [no chance]                   | [no chance]                        |
| [don't know]                                                                                                                    | [don't know]                                                                                                                                                | [don't know]                           | [don't know]                | [don't know]                  | [don't know]                       |

The questionnaire continues on the back of this sheet...

## PERCEPTION & ATTITUDE

|                                                                                                                                                                                                                     |                                                                                      |                                                                           |      |
|---------------------------------------------------------------------------------------------------------------------------------------------------------------------------------------------------------------------|--------------------------------------------------------------------------------------|---------------------------------------------------------------------------|------|
| 8. Do you consider X-rays as dangerous?<br>(please choose 1 answer)                                                                                                                                                 |                                                                                      | [No]<br>[Yes, low danger]<br>[Yes, moderate danger]<br>[Yes, high danger] |      |
| 9. Do you have any worries or concerns about having an X-ray?                                                                                                                                                       |                                                                                      | [Yes]                                                                     | [No] |
| <ul style="list-style-type: none"> <li>If you answered <b>No</b> to the question above, please go to <b>Q12...</b></li> <li>If you answered <b>Yes</b> to the question above, please go to <b>Q10...</b></li> </ul> |                                                                                      |                                                                           |      |
|                                                                                                                                                                                                                     | 10. What is your main concern about X-rays?<br>(please write an answer in the box)   |                                                                           |      |
|                                                                                                                                                                                                                     | 11. Have you ever refused an X-Ray that the doctor recommended, due to your concern? | [Yes]                                                                     | [No] |
| 12. Do you consider nuclear power plants as acceptable?                                                                                                                                                             |                                                                                      | [Yes]                                                                     | [No] |
| 13. Have you ever thought you needed an X-Ray, but not had one carried out?                                                                                                                                         |                                                                                      | [Yes]                                                                     | [No] |
| 14. Should the patient have the final say (rather than the doctor) on deciding whether to have an X-Ray?                                                                                                            |                                                                                      | [Yes]                                                                     | [No] |
| 15. If a new X-ray machine were available that <b>used significantly less radiation</b> , would you be prepared to travel an extra 50 miles to a hospital with this technology?                                     |                                                                                      | [Yes]                                                                     | [No] |
| 16. If a new X-ray machine were available that <b>produced better quality imaging</b> , would you be prepared to travel an extra 50 miles to a hospital with this technology?                                       |                                                                                      | [Yes]                                                                     | [No] |

**Thank you** for completing this questionnaire. Please return the questionnaire to me.

This box is for any comments you may have:
